# Supplementary material for: A turn-on fluorescent probe based on Si-rhodamine for sensitive and selective detection of phosgene in solution and in the gas phase
Source: Royal Society of Chemistry journal article supplement (doi:10.1039/c8tc03242d), 2018-01-01
Supplement: c8tc03242d1.pdf [file c8tc03242d1.pdf]

## Electronic Supplementary Information

A Turn-On Fluorescent Probe based on Si-Rhodamine for Sensitive and  
Selective Detection of Phosgene in Solutions and in the Gas Phase

Man Du, Baolong Huo, Jiemin Liu<sup>\*</sup>, Mengwen Li, Ao Shen, Xue Bai, Yaru  
Lai, Leqiu Fang, Yunxu Yang<sup>\*</sup>

*Department of Chemistry and Chemical Engineering, School of Chemistry and  
Biological Engineering, University of Science and Technology Beijing, Beijing  
100083, China*

**\*Corresponding Author:** Yunxu Yang, Jiemin Liu

E-mail addresses: yxyang@ustb.edu.cn (Yunxu Yang);

liujm@ustb.edu.cn (Jiemin Liu)

## Contents:

|                                                                                                                          |           |
|--------------------------------------------------------------------------------------------------------------------------|-----------|
| <b>ESI1. Table S1</b> Comparisons of proposed method with recently reported strategies for phosgene detection.           | <b>3</b>  |
| <b>ESI2. Fig. S1</b> Structures of probes recently reported for phosgene detection.                                      | <b>4</b>  |
| <b>ESI3. Fig. S2</b> <sup>1</sup> H NMR spectrum of compound <b>DASE</b> in CDCl <sub>3</sub> -d <sub>1</sub> .          | <b>5</b>  |
| <b>ESI4. Fig. S3</b> <sup>13</sup> C NMR spectrum of compound <b>DASE</b> in CDCl <sub>3</sub> -d <sub>1</sub> .         | <b>5</b>  |
| <b>ESI5. Fig. S4</b> HRMS spectrum of compound <b>DASE</b> in CH <sub>3</sub> OH.                                        | <b>6</b>  |
| <b>ESI6. Fig. S5</b> <sup>1</sup> H NMR spectrum of compound <b>SiR-carboxyl</b> in CD <sub>3</sub> OD-d <sub>4</sub> .  | <b>6</b>  |
| <b>ESI7. Fig. S6</b> <sup>13</sup> C NMR spectrum of compound <b>SiR-carboxyl</b> in CD <sub>3</sub> OD-d <sub>4</sub> . | <b>7</b>  |
| <b>ESI8. Fig. S7</b> HRMS spectrum of compound <b>SiR-carboxyl</b> in CH <sub>3</sub> OH.                                | <b>7</b>  |
| <b>ESI9. Fig. S8</b> <sup>1</sup> H NMR spectrum of compound <b>SiR-amide</b> in CD <sub>3</sub> OD-d <sub>4</sub> .     | <b>8</b>  |
| <b>ESI10. Fig. S9</b> <sup>13</sup> C NMR spectrum of compound <b>SiR-amide</b> in CD <sub>3</sub> OD-d <sub>4</sub> .   | <b>8</b>  |
| <b>ESI11. Fig.S10</b> HRMS spectrum of compound <b>SiR-amide</b> in CH <sub>3</sub> OH.                                  | <b>9</b>  |
| <b>ESI12. DFT Calculations.</b>                                                                                          | <b>10</b> |
| <b>ESI13. Detection limit</b>                                                                                            |           |
| <b>Fig. S11</b> The linear relationship between the fluorescence intensity and phosgene concentration.                   | <b>14</b> |
| <b>ESI14. Kinetic studies</b>                                                                                            |           |
| <b>Fig. S12</b> <i>Pseudo</i> -first-order kinetic plot.                                                                 | <b>15</b> |
| <b>ESI15. Fig. S13</b> The reaction mechanism of <b>SiR-amide</b> with phosgene.                                         | <b>16</b> |
| <b>ESI16. Fig. S14</b> ESI-MS spectrum of <b>SiR-amide</b> upon addition of phosgene.                                    | <b>17</b> |
| <b>ESI17. References</b>                                                                                                 | <b>18</b> |

## ESI1.

**Table S1.** Comparisons of proposed method with recently reported strategies for phosgene detection.

| Name/Literature                      | Mechanism                          | Fluorophore                                | Wavelength/nm                                                                                                                    | Detection limit      | Dynamic range          | Response time |
|--------------------------------------|------------------------------------|--------------------------------------------|----------------------------------------------------------------------------------------------------------------------------------|----------------------|------------------------|---------------|
| <b>dRB-EDA</b> <sup>[1]</sup>        | opening of the spiro-(deoxy)lactam | Rhodamine                                  | $\lambda_{\text{ex}} = 560 \text{ nm}$ ,<br>$\lambda_{\text{em}} = 590 \text{ nm}$                                               | 50 nM (phosgene)     | —                      | —             |
| <b>Phos-1</b> <sup>[2]</sup>         | ICT                                | 4,5-diamino-1,8-naphthalimide              | $\lambda_{\text{ex}} = 410 \text{ nm}$ ,<br>$\lambda_{\text{em}} = 442 \text{ nm}$                                               | 1.3 nM (phosgene)    | —                      | 20 min        |
| <b>1-oxime</b> <sup>[3]</sup>        | Dehydration of oxime               | BODIPY                                     | $\lambda_{\text{ex}} = 530 \text{ nm}$ ,<br>$\lambda_{\text{em}} = 570 \text{ nm}$                                               | 0.09 ppb (phosgene)  | —                      | 10 s          |
| <b>IC-phos</b> <sup>[4]</sup>        | ICT                                | 3-benzimidazole iminocoumarin              | $\lambda_{\text{ab}} = 425 \text{ nm}$ ,<br>$\lambda_{\text{em}} = 482 \text{ nm}$                                               | 27 nM (phosgene)     | 0 to 7.5 $\mu\text{M}$ | 2 min         |
| <b>OPD-TPE-Py-2CN</b> <sup>[5]</sup> | AIE                                | tetraphenylethene                          | $\lambda_{\text{ex}} = 365 \text{ nm}$ ,<br>$\lambda_{\text{em}} = 475 \text{ nm}$                                               | 1.87 ppm (phosgene)  | 0 to 15 ppm            | 2 min         |
| <b>Probe 1</b> <sup>[6]</sup>        | ESIPT                              | 2-(2-aminophenyl) benzothiazole            | $\lambda_{\text{ex}} = 475 \text{ nm}$ ,<br>$\lambda_{\text{em}} = 545 \text{ nm}$                                               | 0.14 ppm (phosgene)  | 0-3.0 $\mu\text{M}$    | —             |
| <b>Sensor 1</b> <sup>[7]</sup>       | spirocyclic ring-open reaction     | benzimidazole-fused rhodamine              | $\lambda_{\text{ex}} = 530 \text{ nm}$ ,<br>$\lambda_{\text{em}} = 578 \text{ nm}$                                               | 3.2 ppb (phosgene)   | —                      | 2 min         |
| <b>Sensor 2</b> <sup>[8]</sup>       | Intramolecular cyclization         | 7-hydroxycoumarin                          | $\lambda_{\text{ex}} = 375 \text{ nm}$ ,<br>$\lambda_{\text{em1}} = 445 \text{ nm}$ ,<br>$\lambda_{\text{em2}} = 495 \text{ nm}$ | 1 nM (phosgene)      | —                      | —             |
| <b>NBD-OPD</b> <sup>[9]</sup>        | Reaction between OPD and phosgene  | 4-chloro-7-nitrobenzo [c][1,2,5]oxadiazole | $\lambda_{\text{ex}} = 270 \text{ nm}$ ,<br>$\lambda_{\text{em}} = 315 \text{ nm}$                                               | 7 nM (phosgene)      | —                      | 2 min         |
| <b>RB-OPD</b> <sup>[9]</sup>         | Reaction between OPD and phosgene  | Rhodamine                                  | $\lambda_{\text{ex}} = 530 \text{ nm}$ ,<br>$\lambda_{\text{em}} = 575 \text{ nm}$                                               | 28 nM (phosgene)     | —                      | 1 min         |
| <b>NAP-OPD</b> <sup>[9]</sup>        | Reaction between OPD and phosgene  | 1,8-naphthalimide                          | $\lambda_{\text{ex}} = 340 \text{ nm}$ ,<br>$\lambda_{\text{em}} = 480 \text{ nm}$                                               | 28 nM (phosgene)     | —                      | 3 min         |
| <b>Phos-2</b> <sup>[10]</sup>        | ESIPT                              | peridiamine of naphthalimide               | $\lambda_{\text{ex}} = 400 \text{ nm}$ ,<br>$\lambda_{\text{em}} = 468 \text{ nm}$                                               | 0.2 nM (triphosgene) | —                      | 6 min         |
| <b>o-Pab</b> <sup>[11]</sup>         | PET                                | BODIPY                                     | $\lambda_{\text{ex}} = 450 \text{ nm}$ ,<br>$\lambda_{\text{em}} = 530 \text{ nm}$                                               | 2.7 nM (phosgene)    | —                      | 15 s          |
| <b>8-EDAB</b> <sup>[12]</sup>        | ICT                                | BODIPY                                     | $\lambda_{\text{ex}} = 465 \text{ nm}$ ,<br>$\lambda_{\text{em}} = 512 \text{ nm}$                                               | 0.12 nM (phosgene)   | 0-3.5 $\mu\text{M}$    | 15 s          |
| <b>BTA</b> <sup>[13]</sup>           | ICT                                | benzothiadiazole                           | $\lambda_{\text{ex}} = 380 \text{ nm}$ ,<br>$\lambda_{\text{em}} = 508 \text{ nm}$                                               | 20 nM (phosgene)     | —                      | 20 min        |
| <b>o-Pac</b> <sup>[14]</sup>         | PET                                | BODIPY                                     | $\lambda_{\text{ex}} = 368 \text{ nm}$ ,<br>$\lambda_{\text{em}} = 446 \text{ nm}$                                               | 3 nM (phosgene)      | 0-50 $\mu\text{M}$     | 0.5 min       |
| This work                            | conversion of amide to nitrile     | Si-rhodamine                               | $\lambda_{\text{ex}} = 653 \text{ nm}$ ,<br>$\lambda_{\text{em}} = 679 \text{ nm}$                                               | 8.9 nM (triphosgene) | 0.5-10 $\mu\text{M}$   | 4 min         |

“—“ Not mentioned.

## ESI2.

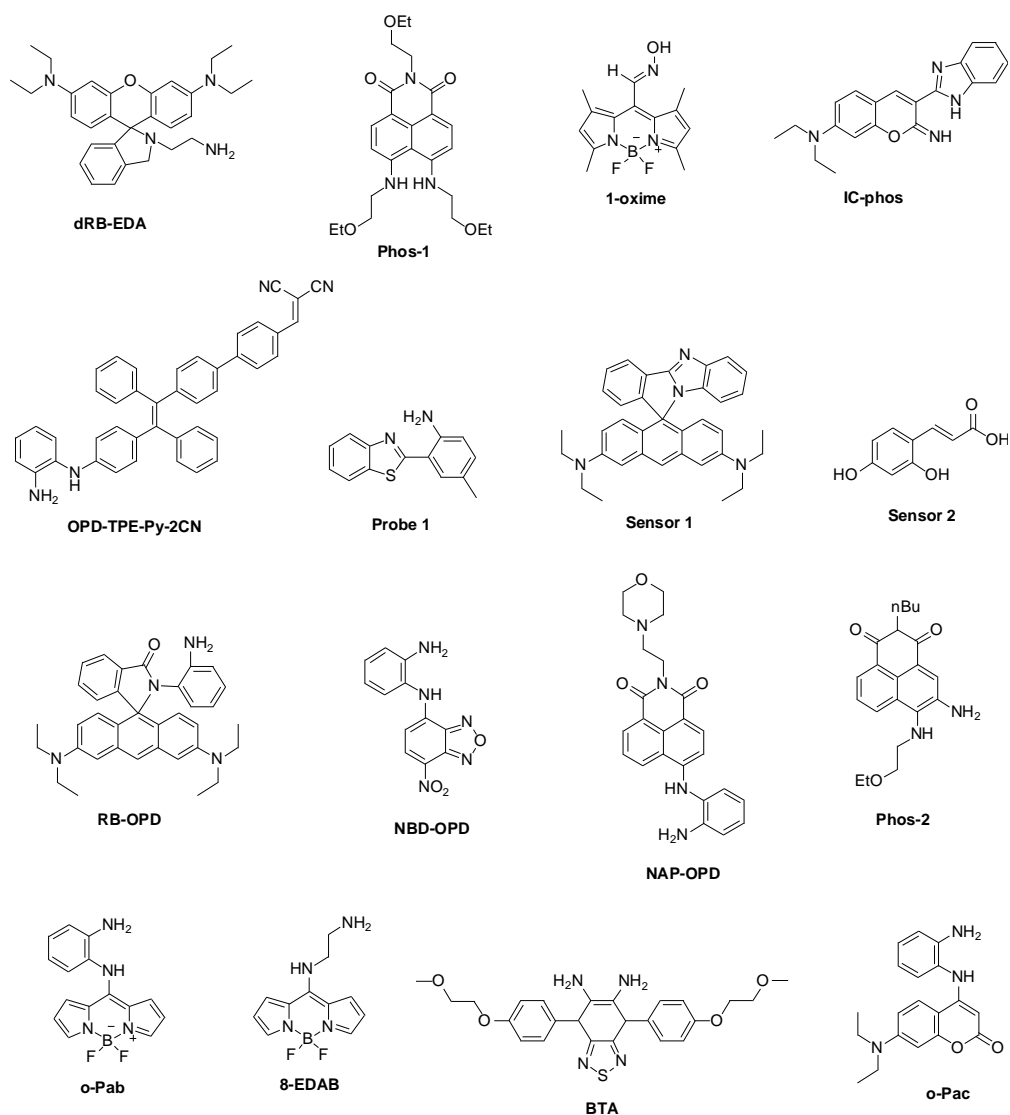

**Fig. S1.** Structures of probes recently reported for phosgene detection.

### ESI3.

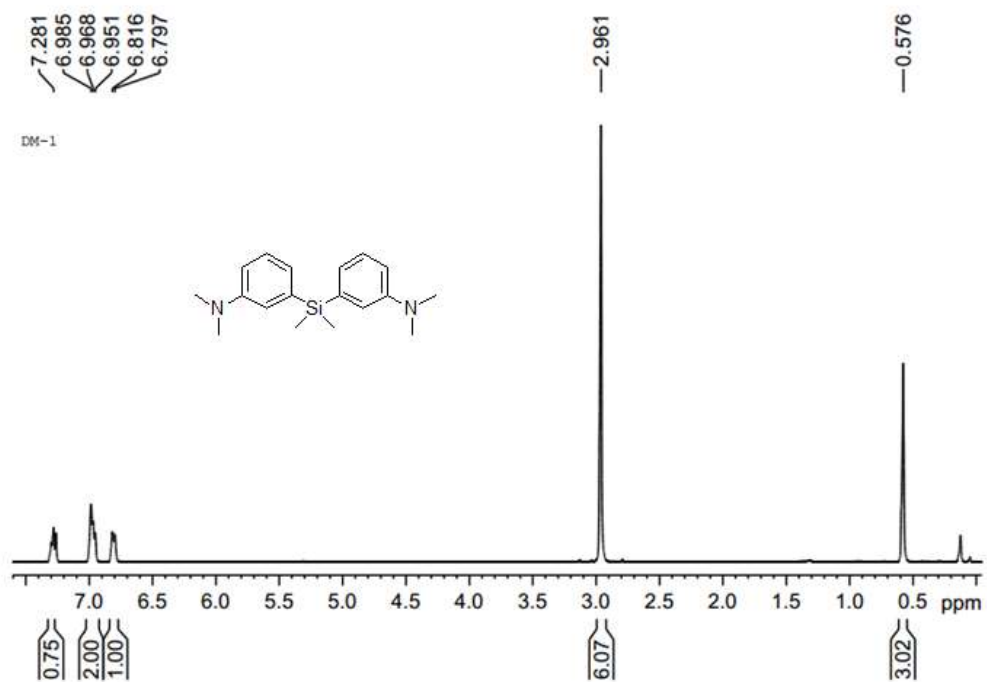

Fig. S2. <sup>1</sup>H NMR spectrum of compound **DASE** in CDCl<sub>3</sub>-d<sub>1</sub>.

### ESI4.

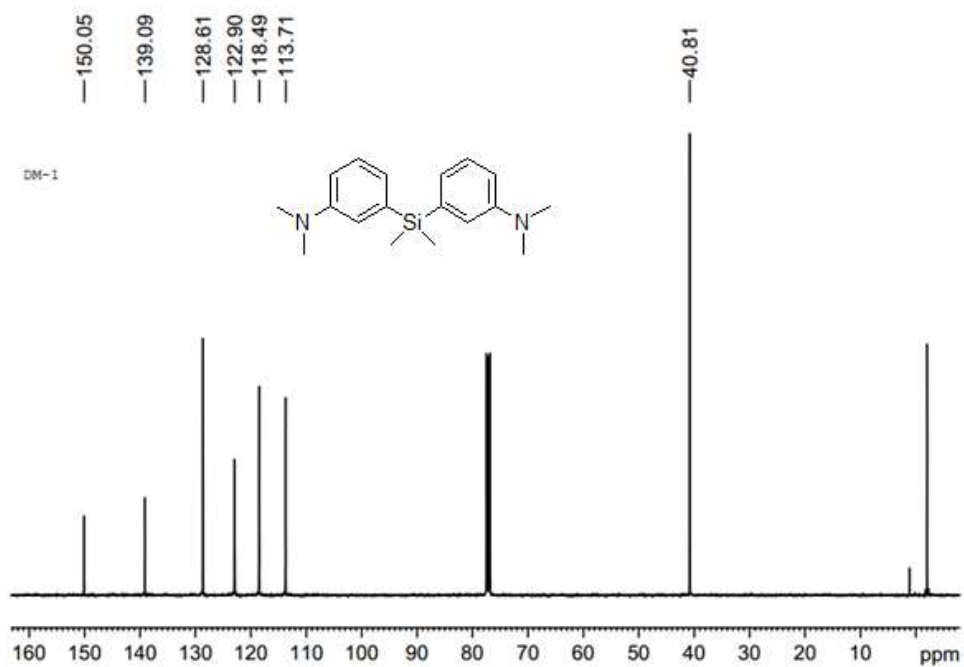

Fig. S3. <sup>13</sup>C NMR spectrum of compound **DASE** in CDCl<sub>3</sub>-d<sub>1</sub>.

## ESI5.

Dama-106 #11 RT: 0.11 AV: 1 NL: 425E9  
T: FIMS +pESI Full ms [50.00-750.00]

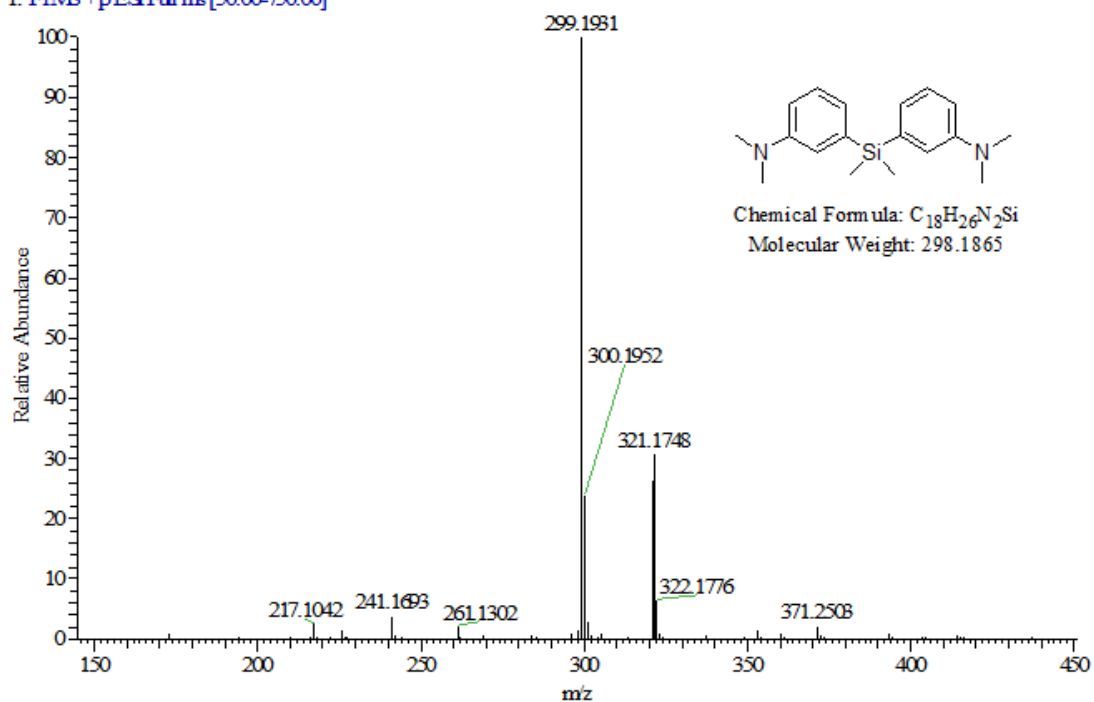

Fig. S4. HRMS spectrum of compound DASE in  $CH_3OH$ .

## ESI6.

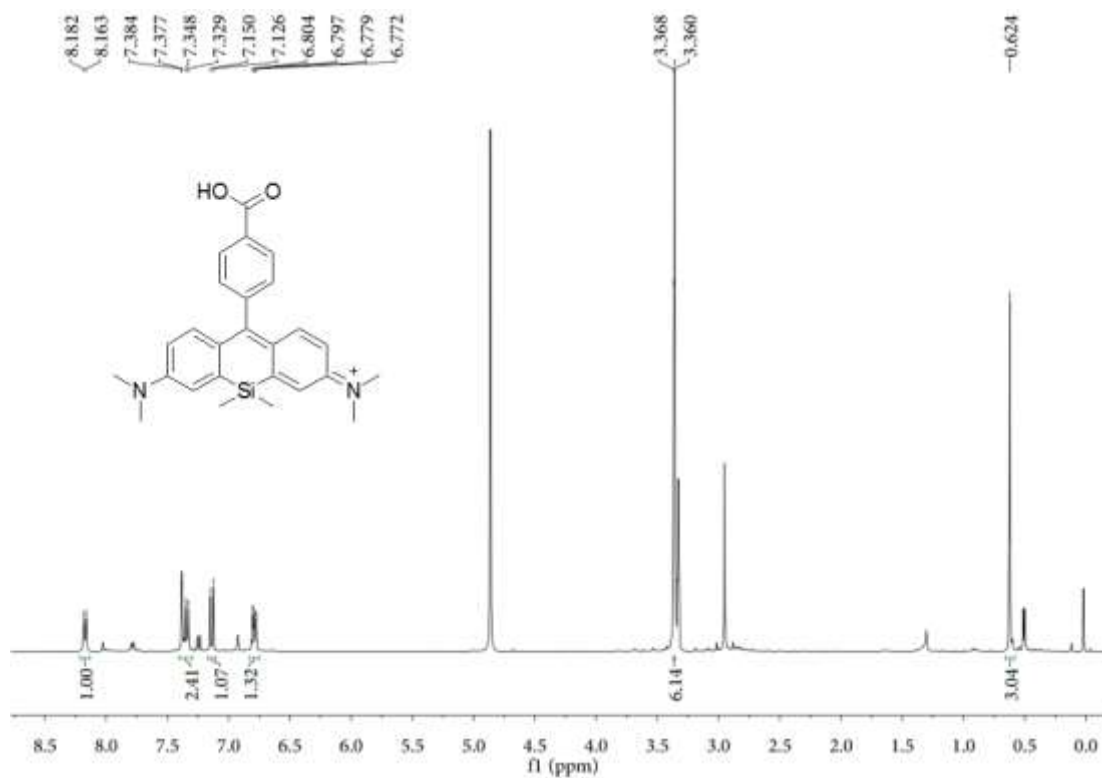

Fig. S5.  $^1H$  NMR spectrum of compound SiR-carboxyl in  $CD_3OD-d_4$ .

### ESI7.

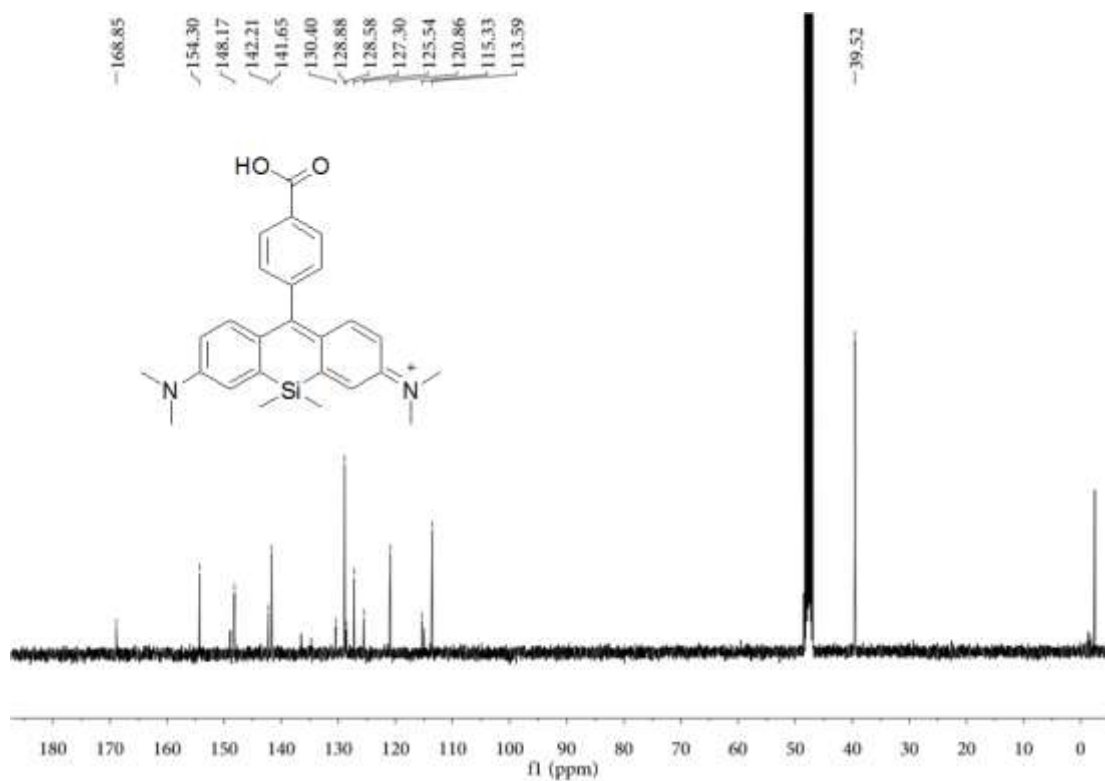

Fig. S6.  $^{13}\text{C}$  NMR spectrum of compound SiR-carboxyl in  $\text{CD}_3\text{OD}-d_4$ .

### ESI8.

2018011703 #11 RT: 0.10 AV: 1 NL: 5.08ES  
T: FIMS+p ESI Full ms [50.0000-750.0000]

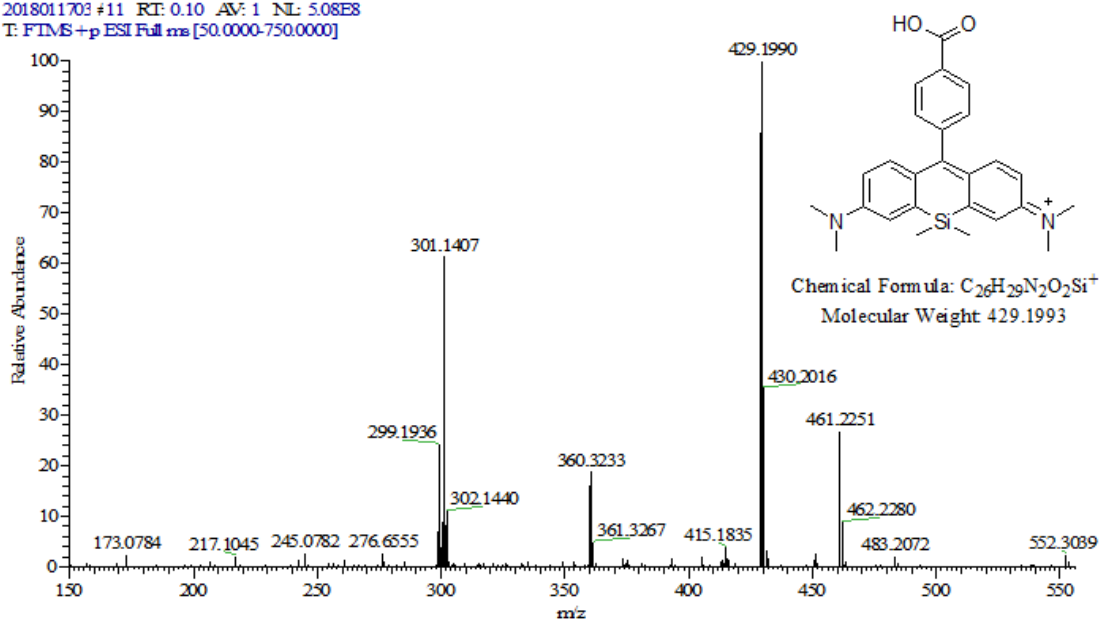

Fig. S7. HRMS spectrum of probe compound SiR-carboxyl in  $\text{CH}_3\text{OH}$ .

**ESI9.**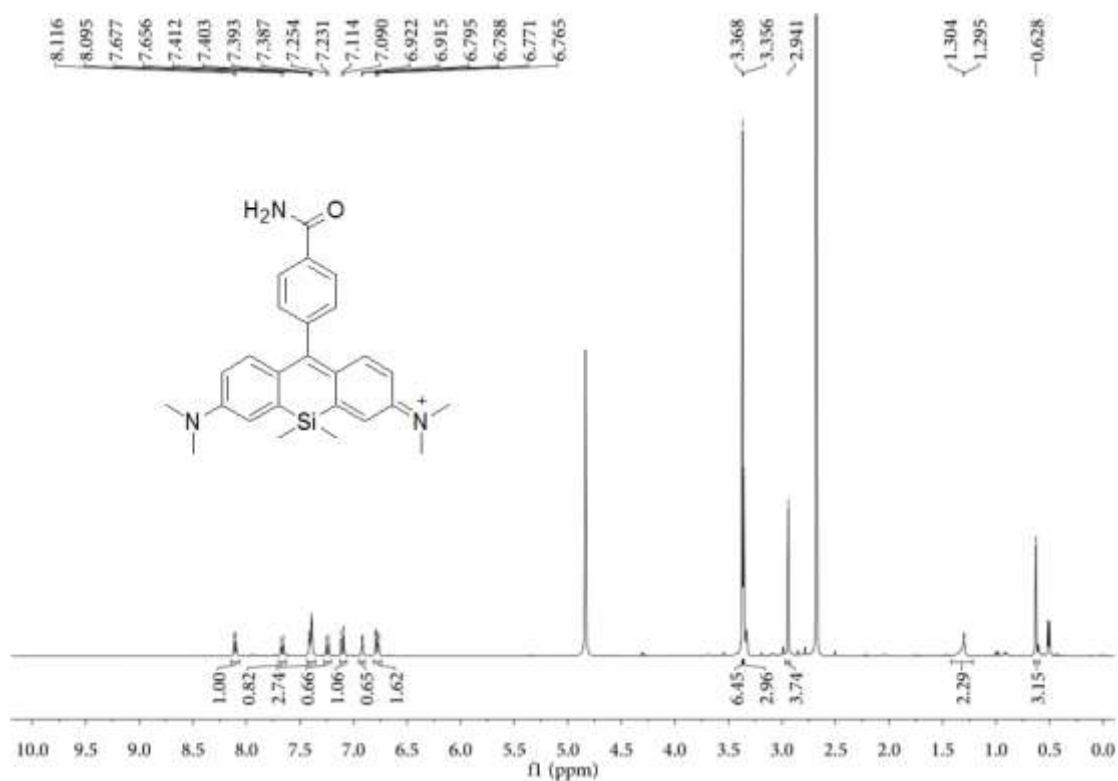**Fig. S8.** <sup>1</sup>H NMR spectrum of compound SiR-amide in CD<sub>3</sub>OD-d<sub>4</sub>.**ESI10.**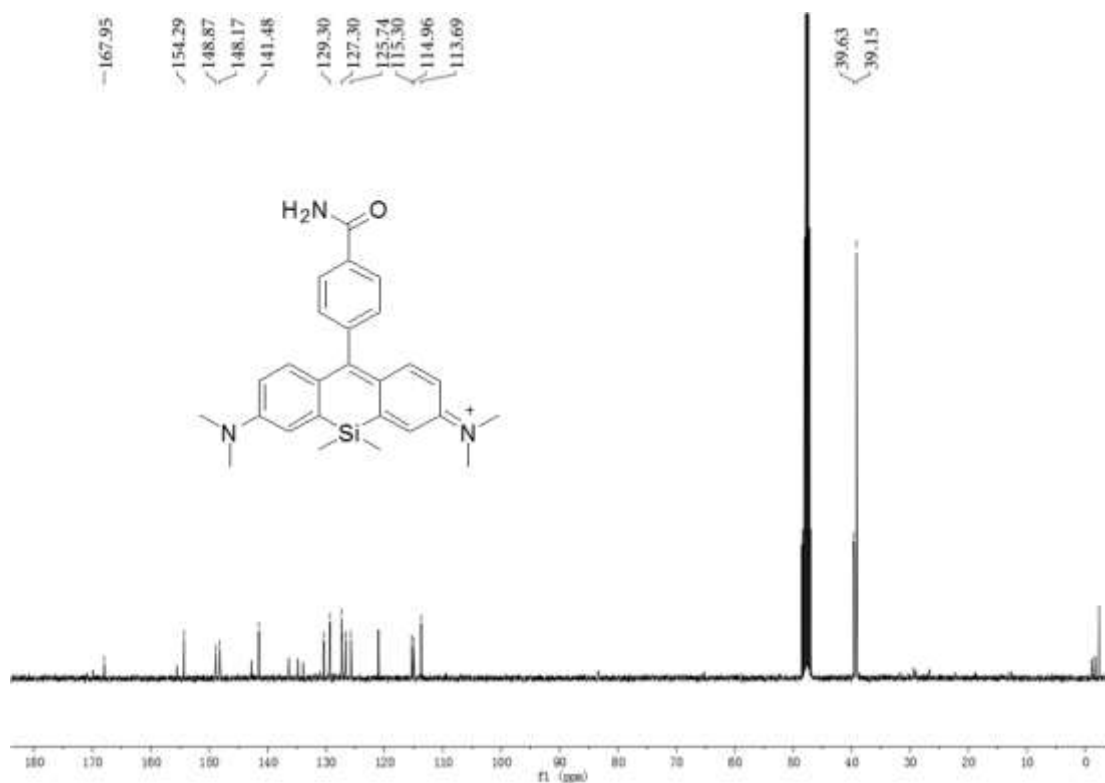**Fig. S9.** <sup>13</sup>C NMR spectrum of compound in SiR-amide CD<sub>3</sub>OD-d<sub>4</sub>.



## ESI11.

2018011702 #11 RT: 0.10 AV: 1 NL: 2.07ES  
T: FTMS+p ESI Full ms [50.0000-750.0000]

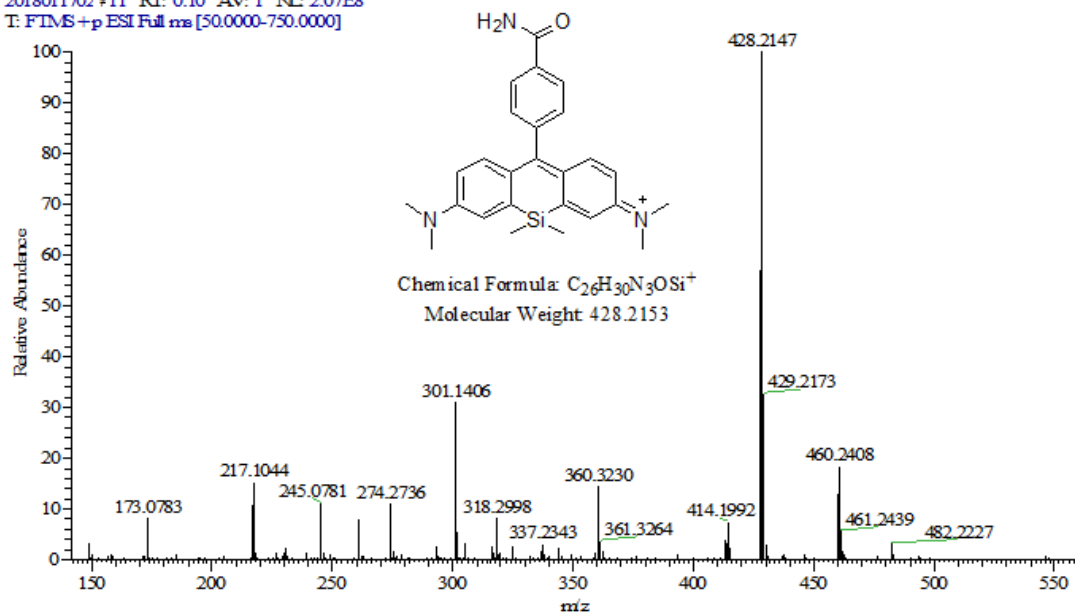

**Fig. S10.** HRMS spectrum of probe compound **SiR-amide** in  $CH_3OH$ .

## ESI12

### DFT Calculations

Geometric optimizations and energy level calculations were performed in the gas phase at the B3LYP 6-311++G (d, p) level of theory, using the Gaussian 09 software package. Absolute energies in Hartrees are given without additional corrections.

• Cartesian Coordinates for **SiR-amide** (Energy : -1537.6620747 hartrees):

|   |           |           |           |
|---|-----------|-----------|-----------|
| C | 0.541054  | -3.679247 | -0.014228 |
| C | 0.881765  | -2.350283 | -0.010420 |
| C | -0.088259 | -1.298849 | 0.007858  |
| C | -1.471589 | -1.697691 | 0.018418  |
| C | -1.803835 | -3.038031 | 0.015617  |
| C | -0.825535 | -4.080667 | 0.000348  |
| C | -1.908432 | 1.213029  | 0.006646  |
| C | -0.469101 | 1.235599  | 0.006355  |
| C | 0.151049  | 2.523957  | 0.002277  |
| H | 1.231700  | 2.590104  | 0.006705  |
| C | -0.563087 | 3.695618  | -0.009563 |
| C | -1.987277 | 3.680575  | -0.017253 |
| C | -2.618156 | 2.397862  | -0.004766 |
| H | 1.330426  | -4.419869 | -0.031193 |
| H | 1.934745  | -2.099289 | -0.025663 |
| H | -2.852039 | -3.316601 | 0.023129  |
| H | -0.024496 | 4.634683  | -0.013962 |
| H | -3.702030 | 2.357410  | -0.004559 |
| C | 3.936972  | 0.525037  | 1.200116  |
| C | 4.628891  | 0.663631  | -0.009338 |
| C | 3.913965  | 0.599323  | -1.211876 |
| C | 2.533991  | 0.419588  | -1.208503 |
| C | 2.554583  | 0.335471  | 1.208071  |
| H | 4.472170  | 0.525607  | 2.145288  |
| H | 4.465068  | 0.684293  | -2.142585 |
| H | 1.991066  | 0.374715  | -2.148615 |
| H | 2.031253  | 0.215790  | 2.152713  |
| C | 6.123748  | 0.836121  | -0.108720 |
| O | 6.718860  | 0.589509  | -1.148286 |
| N | 6.769993  | 1.244032  | 1.029845  |
| H | 7.754441  | 1.452755  | 0.922028  |
| H | 6.280775  | 1.747421  | 1.755444  |
| C | 1.839809  | 0.283749  | 0.003738  |
| C | 0.352592  | 0.062931  | 0.008485  |
| N | -1.181774 | -5.388282 | -0.002599 |
| C | -2.591958 | -5.780897 | 0.008622  |
| H | -3.116451 | -5.406133 | -0.878057 |
| H | -2.658010 | -6.868107 | 0.008033  |

|    |           |           |           |
|----|-----------|-----------|-----------|
| H  | -3.101028 | -5.408310 | 0.905033  |
| C  | -0.157914 | -6.435415 | -0.024163 |
| H  | 0.490108  | -6.373838 | 0.857564  |
| H  | -0.644943 | -7.409665 | -0.021750 |
| H  | 0.462826  | -6.364358 | -0.924673 |
| Si | -2.850559 | -0.416587 | 0.029941  |
| C  | -3.928084 | -0.587255 | -1.509910 |
| H  | -4.704554 | 0.186353  | -1.536022 |
| H  | -3.334556 | -0.498719 | -2.425999 |
| H  | -4.435401 | -1.559002 | -1.530673 |
| C  | -3.883640 | -0.564474 | 1.602616  |
| H  | -4.389570 | -1.535933 | 1.651843  |
| H  | -3.264514 | -0.462487 | 2.500202  |
| H  | -4.659067 | 0.209756  | 1.638992  |
| N  | -2.709629 | 4.827651  | -0.034663 |
| C  | -2.035078 | 6.127453  | -0.047034 |
| H  | -2.784717 | 6.917517  | -0.064506 |
| H  | -1.416365 | 6.261530  | 0.847745  |
| H  | -1.401242 | 6.236353  | -0.934531 |
| C  | -4.172927 | 4.792467  | -0.042866 |
| H  | -4.564470 | 4.299846  | 0.854789  |
| H  | -4.552526 | 5.813212  | -0.062642 |
| H  | -4.553049 | 4.269680  | -0.928182 |

• Cartesian Coordinates for **SiR-nitrile** (Energy : -1461.1983057 hartrees):

|    |           |           |           |
|----|-----------|-----------|-----------|
| C  | 3.728996  | 0.292265  | -0.026698 |
| C  | 2.465385  | 0.825848  | -0.014101 |
| C  | 1.281723  | 0.022326  | 0.001002  |
| C  | 1.471482  | -1.405084 | 0.008618  |
| C  | 2.747636  | -1.931962 | -0.004814 |
| C  | 3.924102  | -1.119066 | -0.024786 |
| C  | -1.471643 | -1.404900 | 0.008442  |
| C  | -1.281753 | 0.022487  | 0.000917  |
| C  | -2.465342 | 0.826122  | -0.014021 |
| H  | -2.374752 | 1.905091  | -0.017392 |
| C  | -3.728994 | 0.292636  | -0.026586 |
| C  | -3.924228 | -1.118677 | -0.024746 |
| C  | -2.747838 | -1.931686 | -0.004891 |
| H  | 4.578201  | 0.963334  | -0.038839 |
| H  | 2.374836  | 1.904816  | -0.017597 |
| H  | 2.867007  | -3.009815 | 0.000606  |
| H  | -4.578146 | 0.963774  | -0.038640 |
| H  | -2.867300 | -3.009532 | 0.000559  |
| C  | 0.000755  | 4.261119  | 1.224653  |
| C  | 0.000304  | 4.969005  | 0.011791  |
| C  | -0.000239 | 4.267021  | -1.204542 |
| C  | -0.000342 | 2.874824  | -1.203541 |
| C  | 0.000679  | 2.868967  | 1.216829  |
| H  | 0.001176  | 4.803958  | 2.164136  |
| H  | -0.000578 | 4.814489  | -2.141334 |
| H  | -0.000768 | 2.337313  | -2.147338 |
| H  | 0.001053  | 2.326953  | 2.158042  |
| C  | 0.000117  | 2.162535  | 0.004936  |
| C  | 0.000024  | 0.658317  | 0.003508  |
| N  | 5.163912  | -1.664594 | -0.040346 |
| C  | 5.343665  | -3.117635 | -0.037968 |
| H  | 4.880154  | -3.576651 | -0.918784 |
| H  | 6.408902  | -3.343879 | -0.058704 |
| H  | 4.915926  | -3.569920 | 0.864313  |
| C  | 6.351874  | -0.807172 | -0.057390 |
| H  | 6.392352  | -0.169082 | 0.832785  |
| H  | 7.242774  | -1.433673 | -0.068945 |
| H  | 6.367926  | -0.171037 | -0.949708 |
| Si | -0.000150 | -2.579507 | 0.052815  |
| C  | 0.000069  | -3.709812 | -1.457829 |
| H  | -0.883696 | -4.358734 | -1.466319 |
| H  | 0.002565  | -3.133837 | -2.389295 |
| H  | 0.881457  | -4.361992 | -1.463580 |

|   |           |           |           |
|---|-----------|-----------|-----------|
| C | -0.000530 | -3.576972 | 1.654901  |
| H | 0.881606  | -4.225168 | 1.716385  |
| H | 0.001725  | -2.922927 | 2.533368  |
| H | -0.885148 | -4.221589 | 1.718232  |
| N | -5.164094 | -1.664084 | -0.040221 |
| C | -6.351976 | -0.806542 | -0.057058 |
| H | -7.242945 | -1.432958 | -0.067876 |
| H | -6.391933 | -0.168097 | 0.832877  |
| H | -6.368410 | -0.170760 | -0.949627 |
| C | -5.343990 | -3.117104 | -0.038240 |
| H | -4.916174 | -3.569694 | 0.863852  |
| H | -6.409253 | -3.343239 | -0.058883 |
| H | -4.880645 | -3.575914 | -0.919253 |
| C | 0.000404  | 6.403291  | 0.015372  |
| N | 0.000485  | 7.565959  | 0.018422  |

### ESI13.

#### Detection limit

The detection limit for phosgene was calculated by the fluorescence titration experiments according to the reported method. A good linear relationship between the fluorescence intensity and  $F^-$  concentration ( $0.5 \mu\text{M}$ - $10 \mu\text{M}$ ) could be obtained ( $R^2=0.9991$ ). The value obtained for the  $F^-$  was found to be  $8.9 \text{ nM}$  by the equation of  $L_{OD}=3\delta/m$  ( $\delta$  was the standard deviation of the blank solution and  $m$  is the absolute value of the slope between intensity versus  $F^-$  concentration).  $\delta= 0.2772$ ,  $m= 93.8384$ .

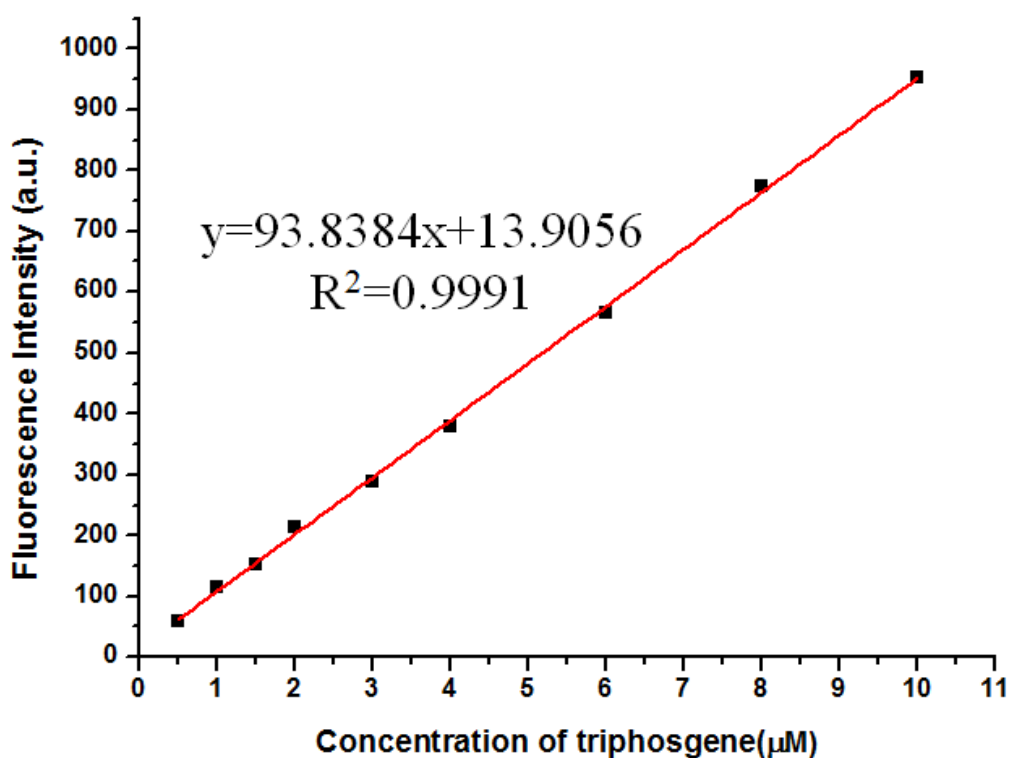

**Fig. S11.** The linear relationship between the fluorescence intensity and phosgene concentration ( $0.5$ - $10 \mu\text{M}$ ) in  $\text{CH}_3\text{CN}$ . Excitation and emission were at  $653 \text{ nm}/679 \text{ nm}$  respectively.

#### ESI14.

##### Kinetic studies:

The reaction of **SiR-amide** (10  $\mu\text{M}$ ) with phosgene in DMSO (pH 8.0, 30 % Tris-HCl) was monitored using the fluorescence intensity at 679 nm. The reaction was carried out at 25  $^{\circ}\text{C}$ . The *pseudo*-first-order rate constant for the reaction was determined by fitting the fluorescence intensities of the samples to the *pseudo*-first-order equation:

$$\text{Ln} [(F_t - F_{\text{min}}) / F_{\text{min}}] = -k't$$

Where  $F_t$  and  $F_{\text{min}}$  are the fluorescence intensities at 679 nm at time  $t$  and the minimum value obtained after the reaction was complete.  $k'$  is the *pseudo*-first-order rate constant. The *pseudo*-first-order plots for the reaction of **SiR-amide** with 2 equiv. of phosgene is shown in Fig. S12, the *pseudo*-first-order rate constant  $k' = 1/t_1 = 0.3966 \text{ min}^{-1}$ .

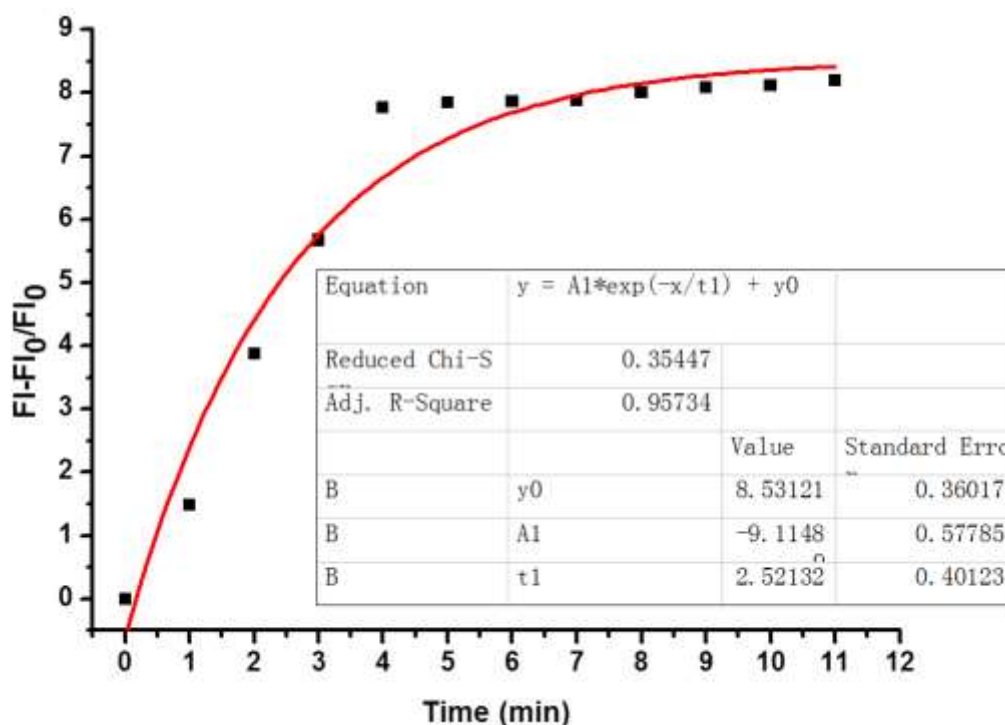

**Fig. S12.** *Pseudo*-first-order kinetic plot of the reaction of **SiR-amide** (10  $\mu\text{M}$ ) with phosgene (2 equiv.) in  $\text{CH}_3\text{CN}$ .  $k = 0.3966 \text{ min}^{-1}$ .

ESI15.

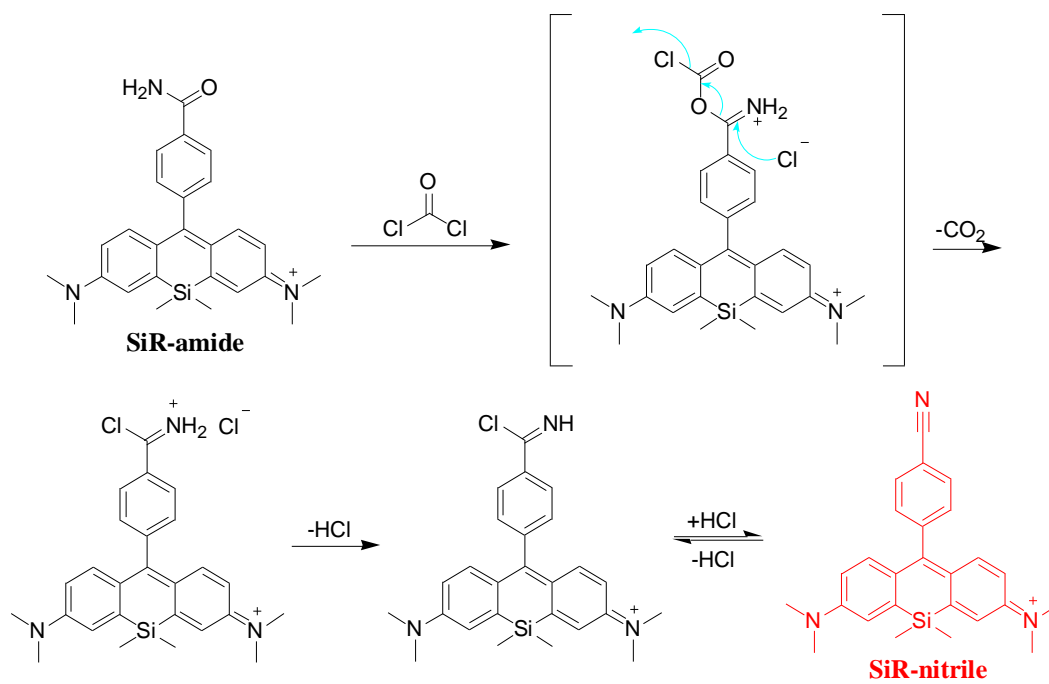

Fig. S13. The reaction mechanism of SiR-amide with phosgene.



## ESI16.

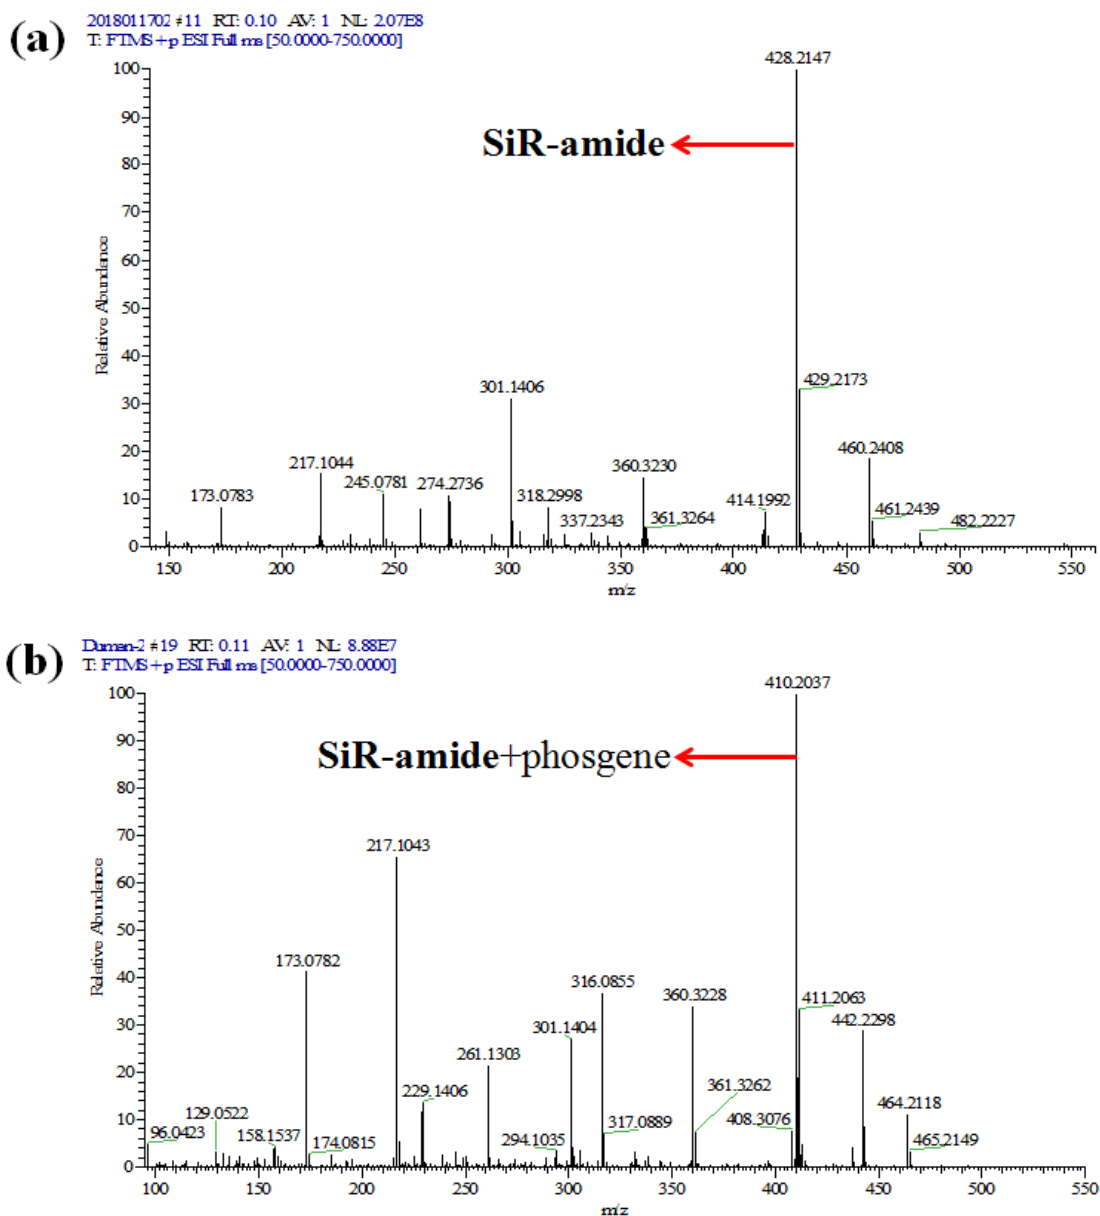

**Fig. S14.** ESI-MS spectrum (positive ion mode) of **SiR-amide** upon addition of phosgene in  $\text{CH}_3\text{CN}$ . (a) only **SiR-amide**, (b) the isolated aggregates of compound after **SiR-amide** reacted with phosgene for 5 min.

## ESI17.

### References

- [1] X. J. Wu, Z. S. Wu, Y. H. Yang and S. F. Han, *Chem. Commun.*, 2012, **48**, 1895.
- [2] S. L. Wang, L. Zhong, Q. H. Song and W. H. Zhu, *Chem. Commun.*, 2017, **53**, 1530.
- [3] T. I. Kim, B. Hwang, J. Bouffard and Y. Kim, *Anal. Chem.*, 2017, **89**, 12837.
- [4] W. Y. Feng, S. Y. Gong, E. B. Zhou, X. Y. Yin and G. Q. Feng, *Anal. Chim. Acta*, 2018, 1.
- [5] H. T. Xie, Y. L. Wu, F. Zeng, J. J. Chen and S. Z. Wu, *Chem. Commun.*, 2017, **53**, 9813.
- [6] L. Y. Chen, D. Wu, J. M. Kim and J. Yoon, *Anal. Chem.*, 2017, **89**, 12596.
- [7] Y. Hu, X. Zhou, H. Jung, S. J. Nam, M. H. Kim and J. Yoon, *Anal. Chem.*, 2018, **90**, 3382.
- [8] P. Kundu and K. C. Hwang, *Anal. Chem.*, 2012, **84**, 4594.
- [9] Y. Hu, L. Y. Chen, H. Jung, Y. Y. Zeng, S. Lee, K. M. K. Swamy, X. Zhou, M. H. Kim and J. Yoon, *ACS Appl. Mater. Interfaces*, 2016, **8**, 22246.
- [10] S. L. Wang, L. Zhong and Q. H. Song, *Chem. Eur. J.*, 2018, **24**, 5652.
- [11] H. C. Xia, X. H. Xu and Q. H. Song, *Anal. Chem.*, 2017, **89**, 4192.
- [12] Y. L. Zhang, A. D. Peng, X. K. Jie, Y. L. Lv, X. F. Wang and Z. Y. Tian, *ACS Appl. Mater. Interfaces*, 2017, **9**, 13920.
- [13] W. Q. Zhang, K. Cheng, X. Y. Yang, Q. Y. Li, H. Zhang, Z. Ma, H. Lu, H. Wu and X. J. Wang, *Org. Chem. Front.*, 2017, **4**, 1719.
- [14] H. C. Xia, X. H. Xu and Q. H. Song, *ACS Sens.*, 2017, **2**, 178.
